# Supplementary material for: Synthesis and adsorption study of hyper-crosslinked styrene-based nanocomposites containing multi-walled carbon nanotubes
Source: Royal Society of Chemistry journal article supplement (doi:10.1039/c6ra25481k), 2017-01-01
Supplement: c6ra25481k1.pdf [file c6ra25481k1.pdf]

**Synthesis and adsorption study of hyper-crosslinked styrene-based  
nanocomposites containing multi-walled carbon nanotubes**

**ELECTRONIC SUPPLEMENTARY INFORMATION**

Rachele Castaldo <sup>a,b</sup>, Roberto Avolio <sup>a</sup>, Mariacristina Cocca <sup>a</sup>, Gennaro Gentile <sup>a,\*</sup>, Maria Emanuela Errico <sup>a</sup>, Maurizio Avella <sup>a</sup>, Cosimo Carfagna <sup>a</sup>, Veronica Ambrogi <sup>a,b</sup>

<sup>a</sup> Institute for Polymers, Composites and Biomaterials, National Research Council of Italy, Via Campi Flegrei 34, 80078 Pozzuoli, Italy

<sup>b</sup> Department of Chemical, Materials and Production Engineering, University of Naples, Piazzale Tecchio 80, 80125 Napoli, Italy

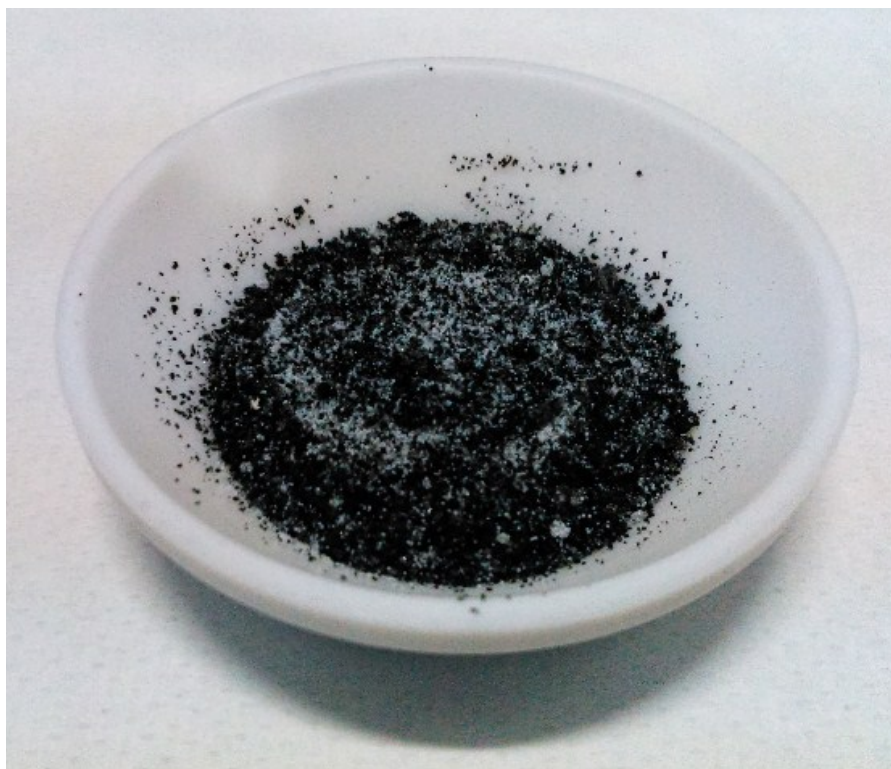

**Figure S1.** Inhomogeneous product obtained by the suspension polymerization of 2mol% DVB, 98mol% VBC and 3phr of unmodified MWCNT.

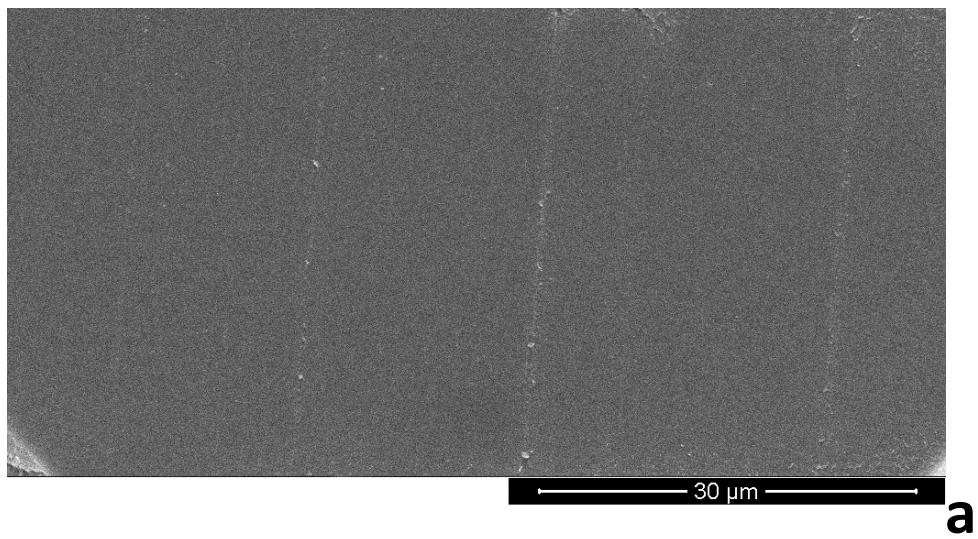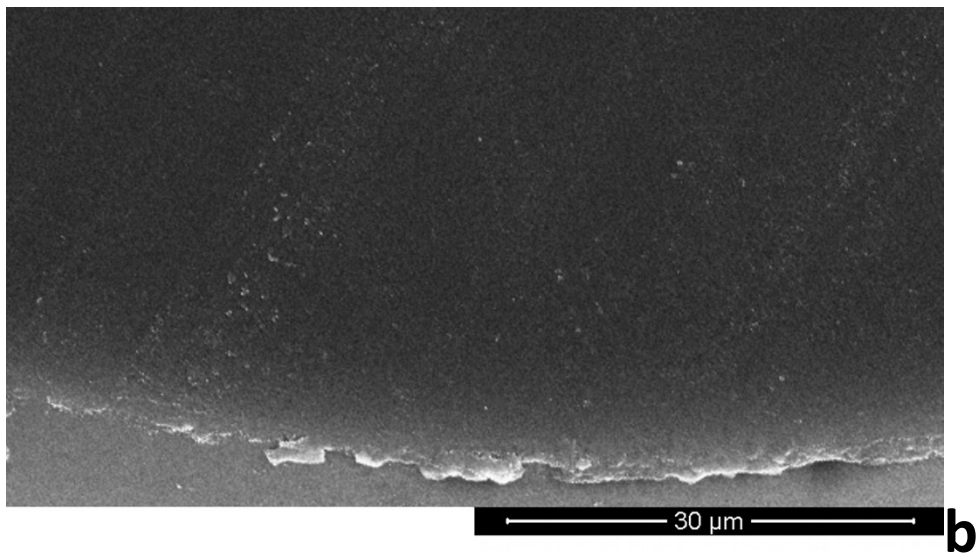

**Figure S2.** SEM micrographs of the cross-sections of:  
a) DVB-VBC precursor beads; b) DVB-ST-VBC precursor beads.
